# Supplementary material for: Aggregates of a triphenylene based chemosensing ensemble for sensitive detection of cyanide ions in an aqueous medium
Source: Royal Society of Chemistry journal article supplement (doi:10.1039/c2dt32427j), 2012-12-17
Supplement: c2dt32427j.pdf [file c2dt32427j.pdf]

## Supporting Information

### Aggregates of Triphenylene Based Chemosensing Ensemble for Sensitive Detection of Cyanide Ions in Aqueous Medium

Vandana Bhalla\* Harshveer Arora and Manoj Kumar.

*Department of Chemistry, UGC Sponsored Centre for Advance Studies-I, Guru Nanak Dev University, Amritsar-143005, Punjab, India.*

| Page No. | Contents                                                                                                    |
|----------|-------------------------------------------------------------------------------------------------------------|
| S2       | Effect of temperature on the absorption spectra of aggregates of copper ensemble of derivative <b>3</b>     |
| S3       | Effect of temperature on the fluorescence intensity of aggregates of copper ensemble of derivative <b>3</b> |
| S4       | XRD analysis of aggregates of copper ensemble of derivate <b>3</b>                                          |
| S5       | <sup>1</sup> H NMR spectrum of <b>3</b>                                                                     |
| S6       | Expanded <sup>1</sup> H NMR spectrum of <b>3</b>                                                            |
| S7       | <sup>13</sup> C NMR spectrum of <b>3</b>                                                                    |
| S8       | Mass spectrum of <b>3</b>                                                                                   |
| S9       | Mass spectrum of Cu complex of <b>3</b>                                                                     |
| S10      | Fluorescence emission spectra of <b>3</b> .Cu <sup>2+</sup> upon the addition of NaCN in tap water          |
| S11-S12  | Comparison of receptor <b>3</b> with other receptors reported in the literature                             |

### Effect of temperature on the absorption spectra of aggregates of copper ensemble of derivative 3

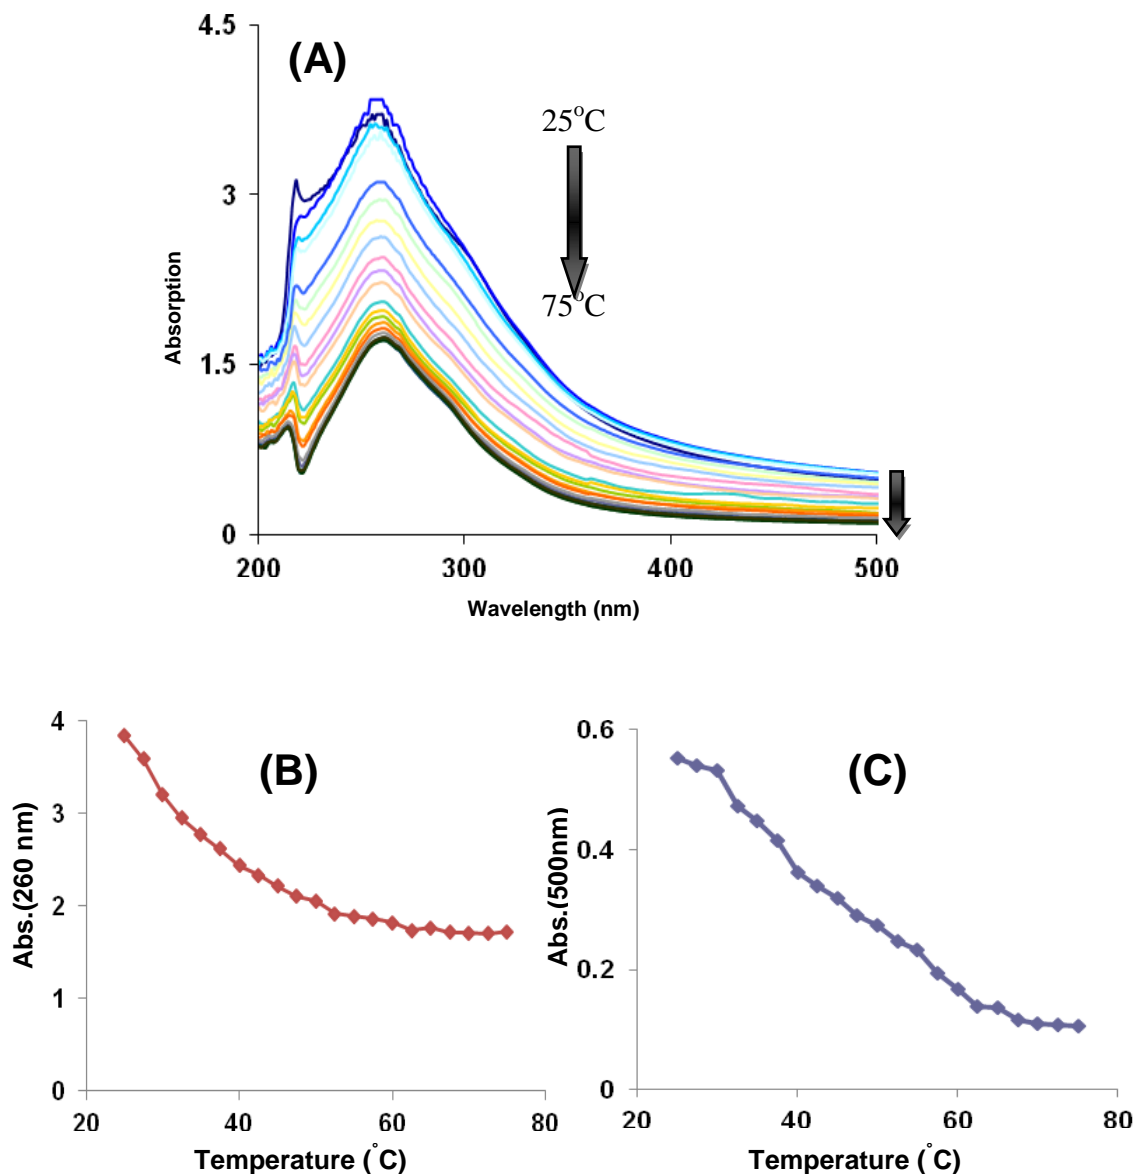

**Figure S1:** (A) Absorption spectra of aggregates of copper ensemble of derivative 3 upon increasing the temperature from 25 °C to 75 °C. (B-C) Change in the absorption intensity at 260 nm and 500 nm respectively upon increasing the temperature.

## Effect of temperature on the fluorescence intensity of aggregates of copper ensemble of derivative 3

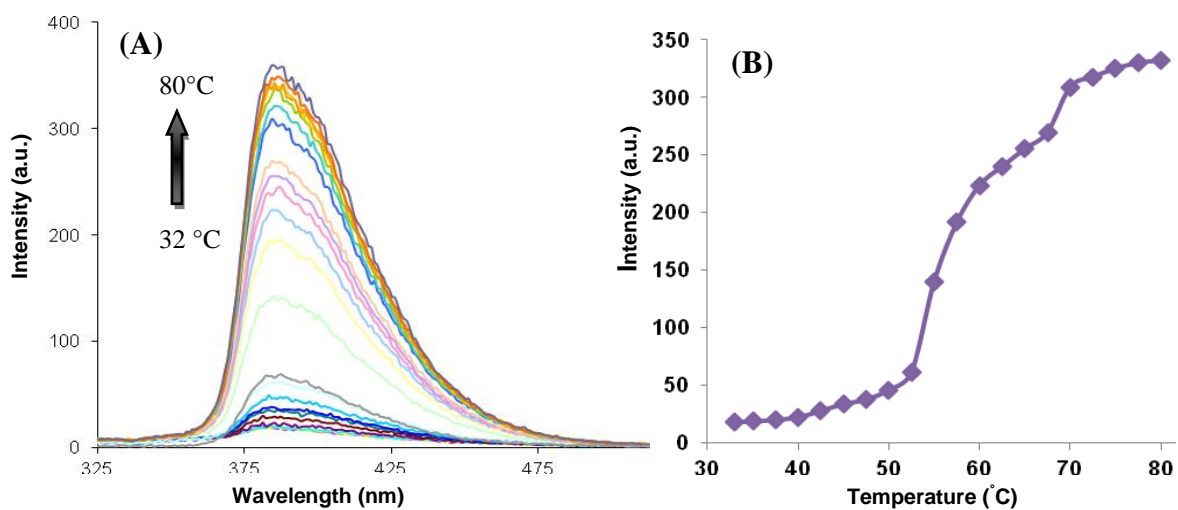

**Figure: S2** (A) Fluorescence spectra of  $3.Cu^{2+}$  upon increasing the temperature from 32 °C to 80 °C (B) Effect of increasing temperature on fluorescence intensity of aggregates of copper ensemble of **3**,  $3.Cu^{2+}$  in EtOH:H<sub>2</sub>O (8:2)  $\lambda_{ex}$  = 293 nm.

## XRD analysis of aggregates of copper ensemble of derivative 3

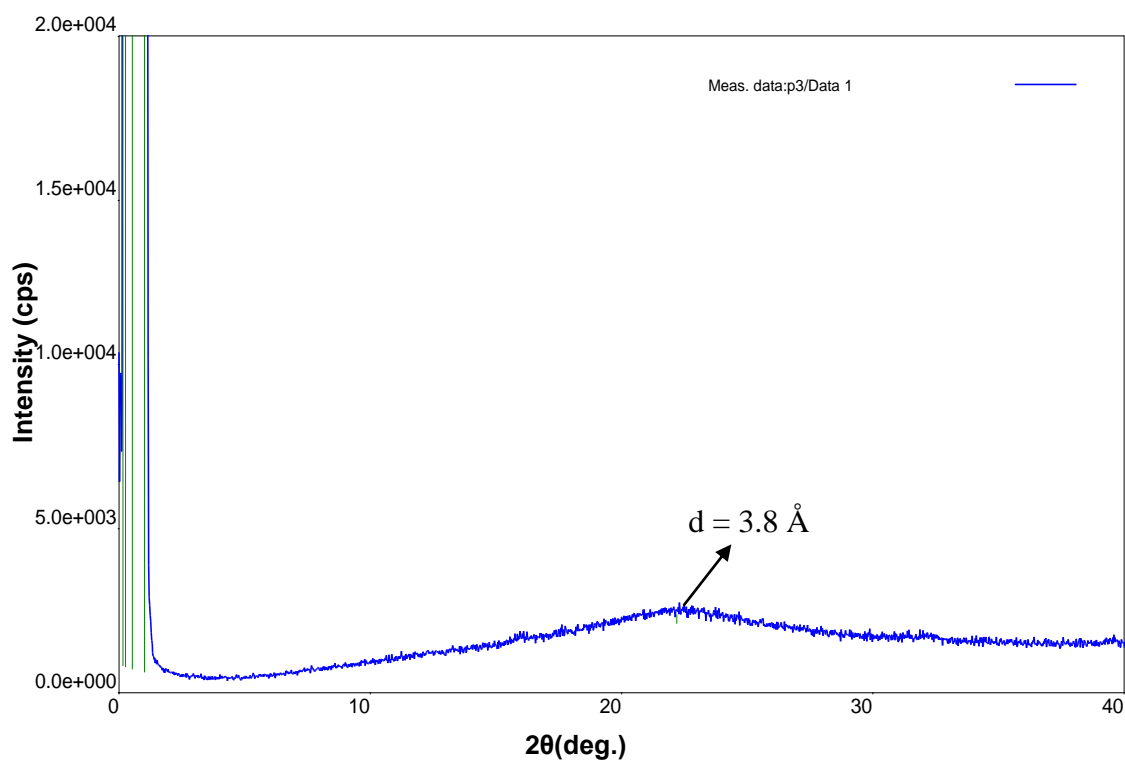

**Figure S4:** Powder XRD pattern of aggregates of copper ensemble of triphenylene derivative 3

### $^1\text{H}$ NMR spectrum of **3**

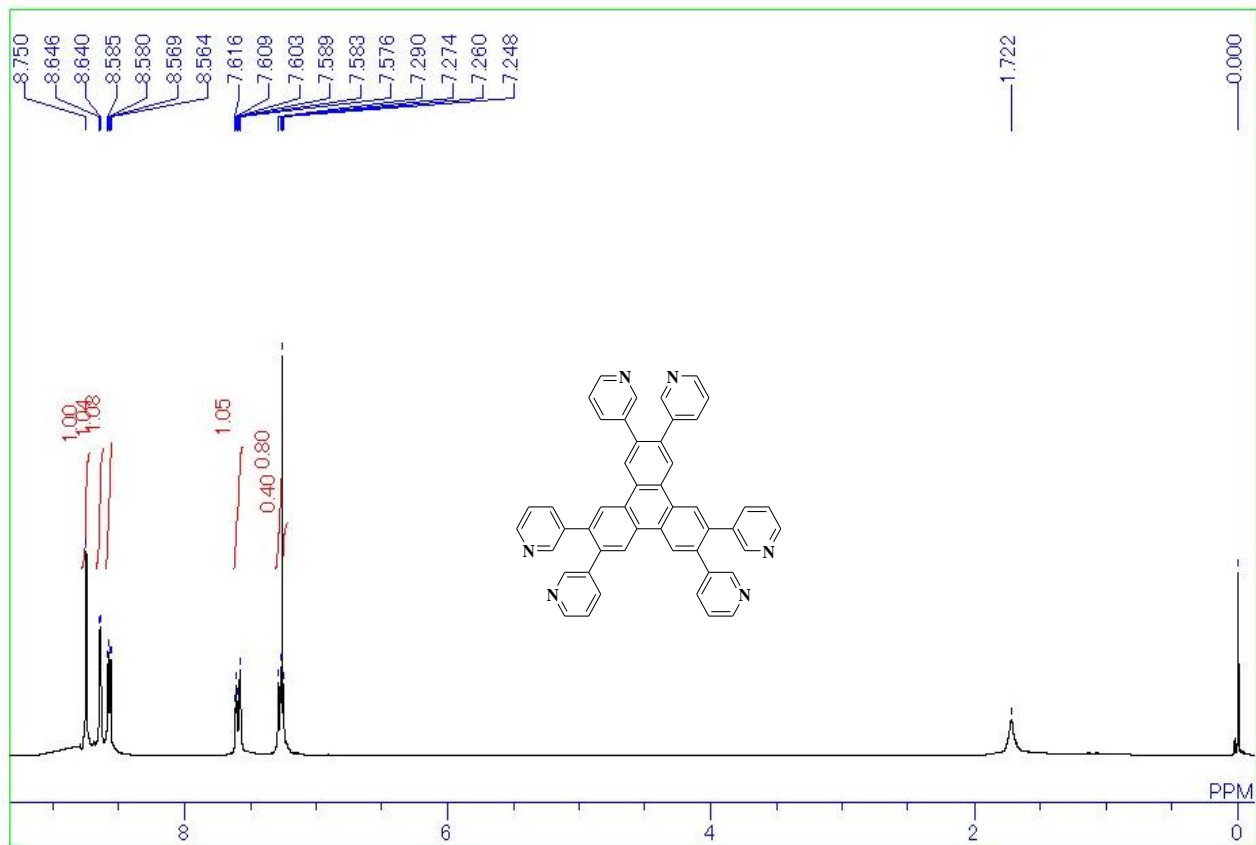

## Expanded $^1\text{H}$ NMR spectrum of **3**

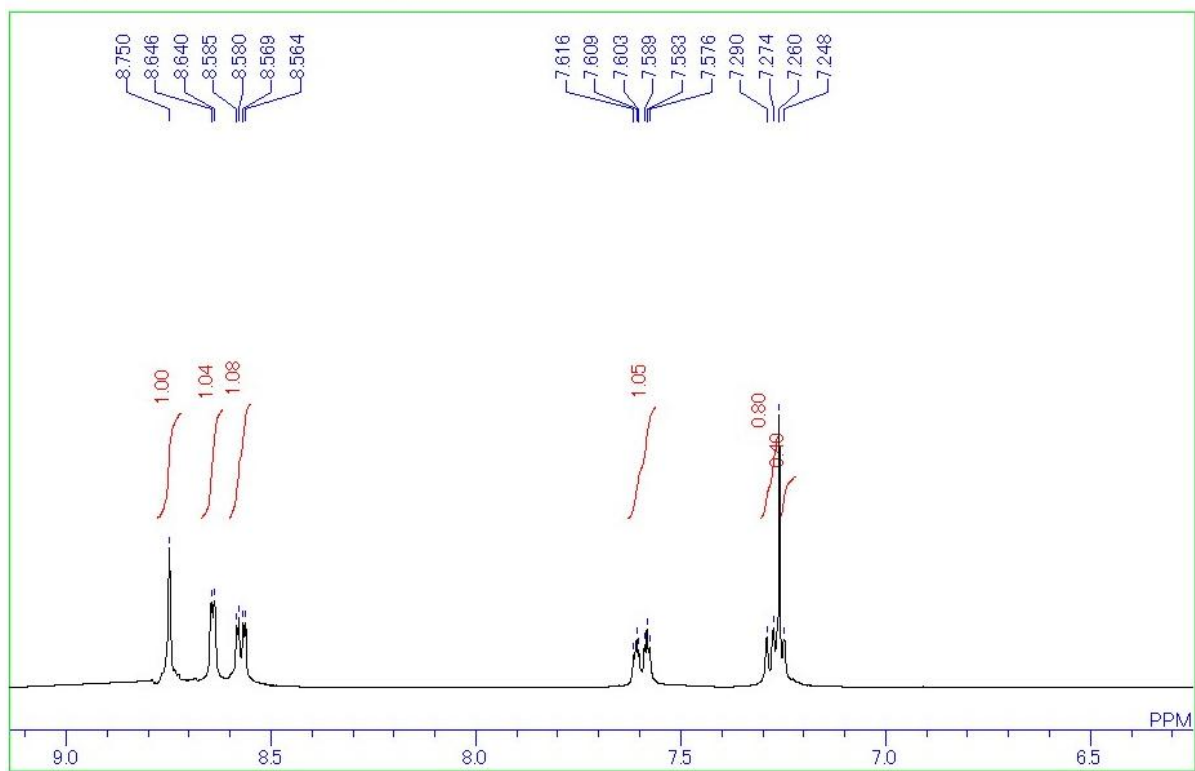

### <sup>13</sup>C NMR spectrum of 3

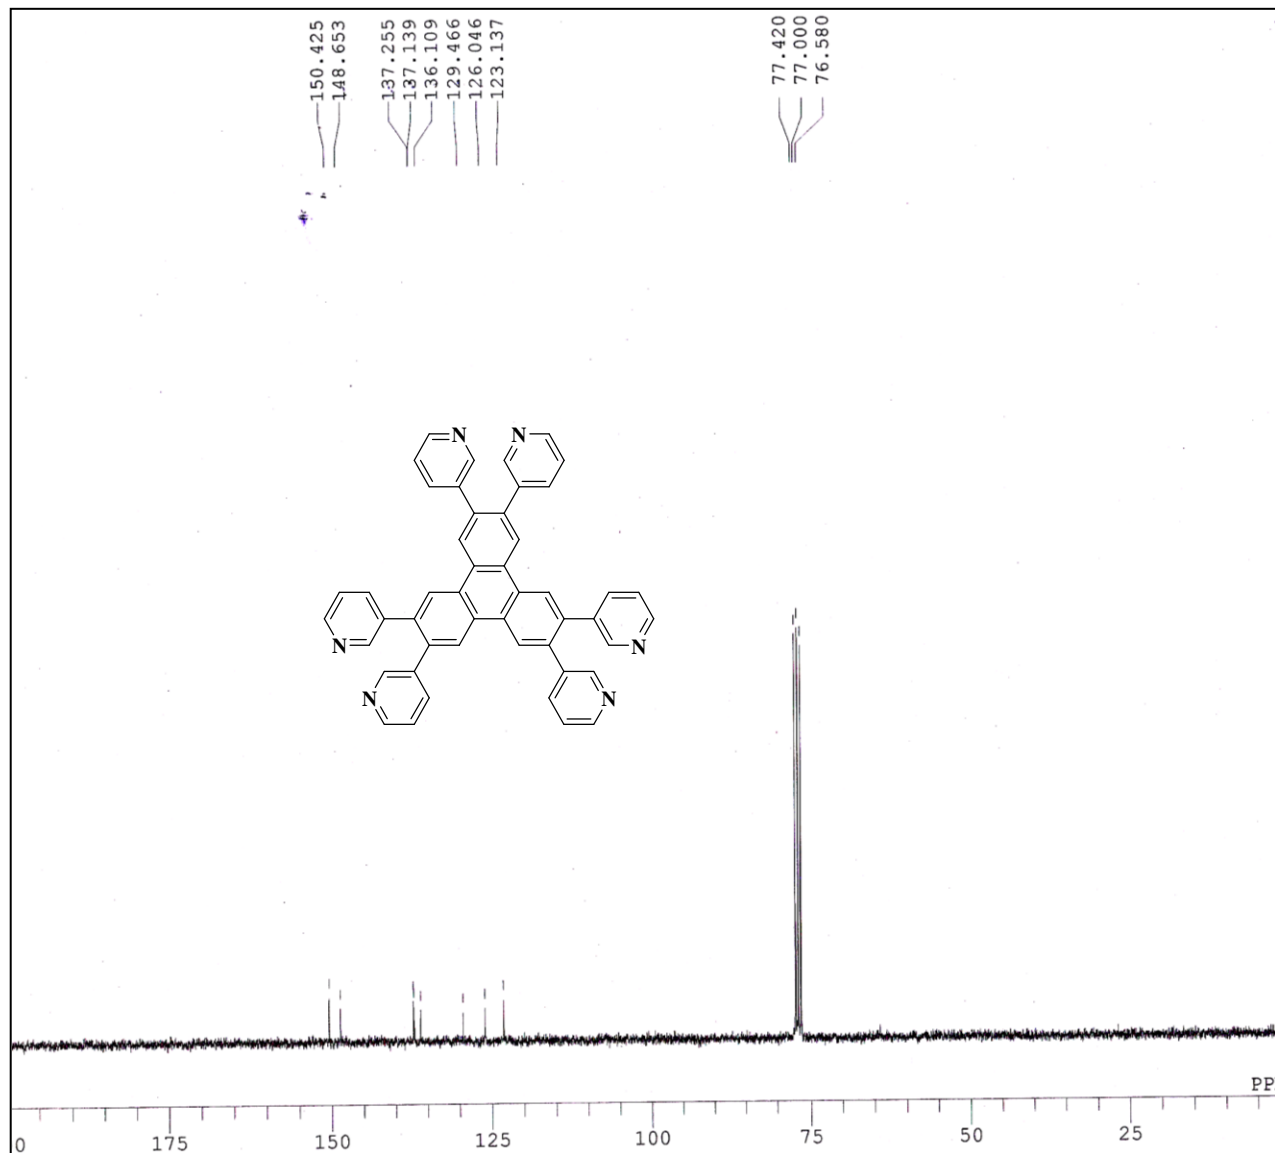

### FAB Mass spectrum of 3

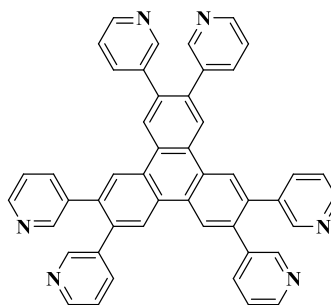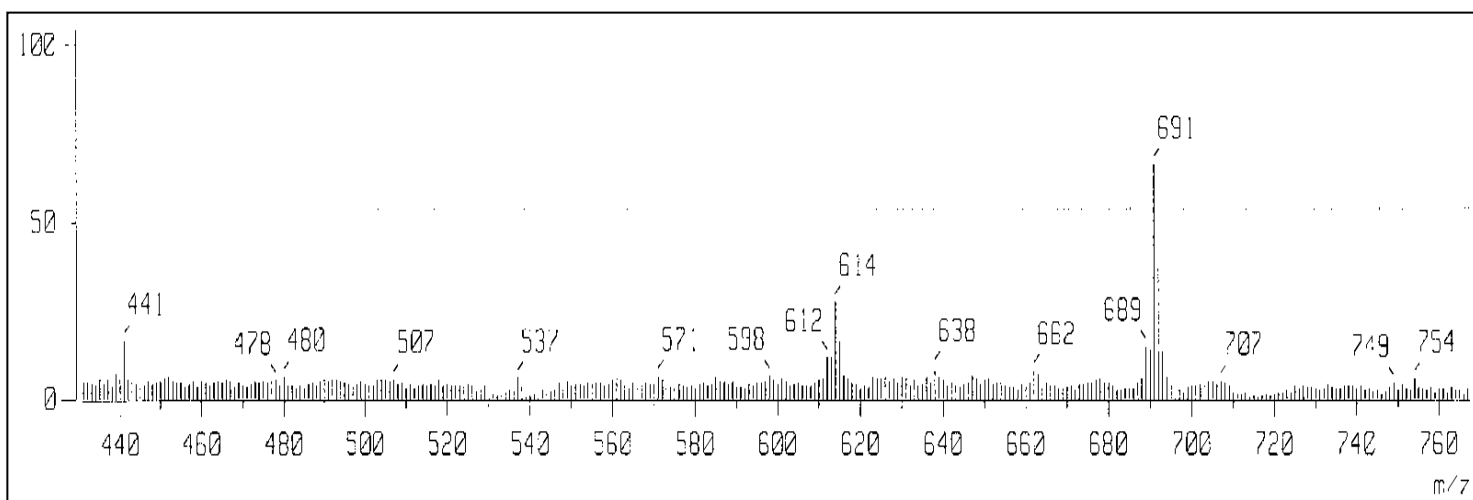



### ESI Mass spectrum of Cu complex of **3**

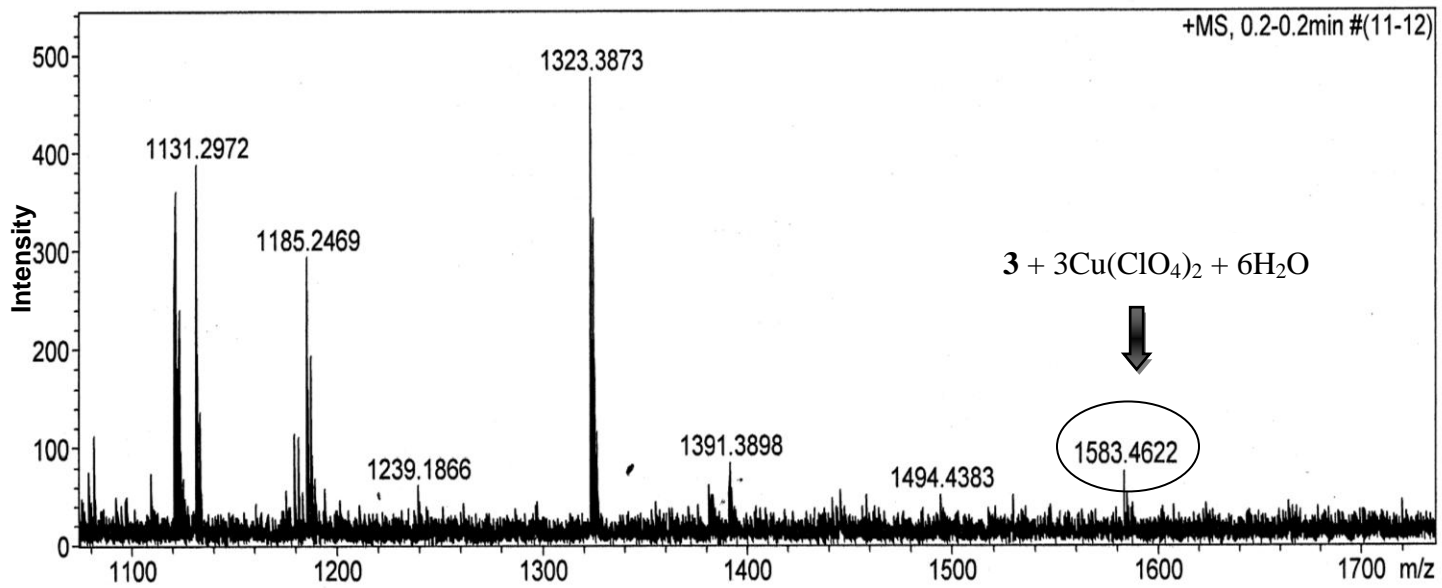

## Fluorescence emission spectra of $3.Cu^{2+}$ upon the addition of NaCN in tap water

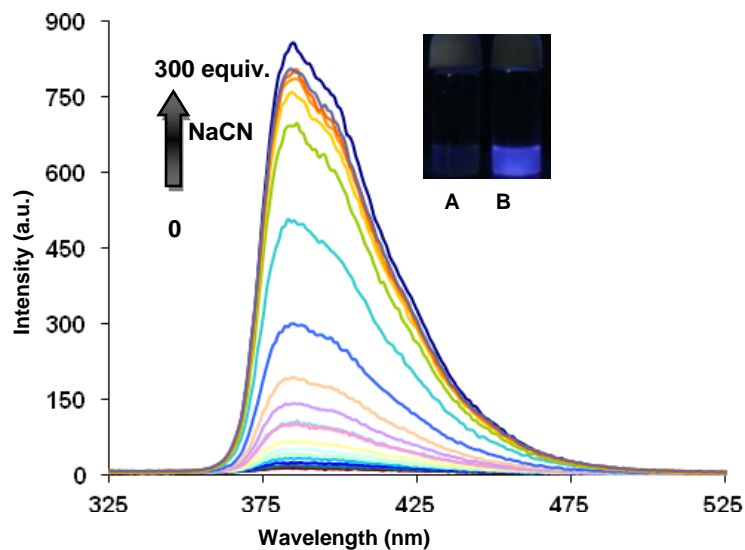

**Figure S5:** Fluorescence emission spectra of receptor  $3.Cu^{2+}$  upon the addition of NaCN (0–300 equiv) in EtOH: H<sub>2</sub>O (8:2) mixture. Inset shows fluorescence images of (A) copper ensemble,  $3.Cu^{2+}$  ( $1 \times 10^{-4}$  M) (B)  $3.Cu^{2+}$  + NaCN in EtOH: H<sub>2</sub>O (8:2) mixture.

### Comparison of receptor 3 with other receptors reported in the literature

| S.No. | References                                                                                                         | Interference by other anions                                      | Solvent system used for cyanide sensing           | Detection limit of CN <sup>-</sup> ions | Ability to detect cyanide in tap water | Copper induced self-assembly |
|-------|--------------------------------------------------------------------------------------------------------------------|-------------------------------------------------------------------|---------------------------------------------------|-----------------------------------------|----------------------------------------|------------------------------|
| 1     | R. Yang, W. Wu, W.Wang, Z. Li, J. Qin <i>Macromol. Chem. Phys.</i> 2010, <b>211</b> , 18.                          | I <sup>-</sup> , OAc <sup>-</sup> , SO <sub>3</sub> <sup>2-</sup> | THF                                               | 0.47 ppm                                | NO                                     | NO                           |
| 2     | Z. Li, X. Lou, H. Yu, Z. Li and J. Qin, <i>Macromolecules</i> , 2008, <b>41</b> , 7433.                            | I <sup>-</sup> , F <sup>-</sup> , SO <sub>4</sub> <sup>2-</sup>   | THF                                               | 0.31 ppm                                | NO                                     | NO                           |
| 3.    | Y. Liu, X. Lv, Y. Zhao, J. Liu, Y.-Q. Sun, P. Wang and W. Guo <i>J. Mater. Chem.</i> , 2012, <b>22</b> , 1747.     | NO                                                                | CH <sub>3</sub> CN/H <sub>2</sub> O [9 : 1 (v/v)] | 0.13 ppm                                | NO                                     | NO                           |
| 4     | S. Dong, D. Ou, J. Qin, Z. Li <i>Journal of Polymer Science Part A: Polymer Chemistry</i> , 2011, <b>49</b> , 3314 | I <sup>-</sup>                                                    | THF                                               | 0.05 ppm                                | NO                                     | NO                           |
| 5     | Q. Zeng, P. Cai, Z. Li, J. Qin and B. Z. Tang <i>Chem. Commun.</i> , 2008, 1094.                                   | HPO <sub>4</sub> <sup>2-</sup> , PO <sub>4</sub> <sup>3-</sup>    | EtOH                                              | 1.82 ppm                                | NO                                     | NO                           |
| 6     | X. Lou, Q. Zeng, Y. Zhang, Z. Wan, J. Qin and Z. Li <i>J. Mater. Chem.</i> , 2012, <b>22</b> , 5581                | NO                                                                | EtOH                                              | 0.078                                   | YES                                    | NO                           |

|           |                                                                                                                        |                                                    |                                                                     |                             |            |            |
|-----------|------------------------------------------------------------------------------------------------------------------------|----------------------------------------------------|---------------------------------------------------------------------|-----------------------------|------------|------------|
| 7         | Y.-H.Tang, Y. Qu, Z. Song, X.-P. He, J. X., J. Hua and G.-R. Chen<br><i>Org. Biomol. Chem.</i> , 2012, <b>10</b> , 555 | $\text{H}_2\text{PO}_4^{2-}$ ,<br>$\text{HSO}_4^-$ | MeOH                                                                | 0.001 ppm<br>(0.000962 ppm) | NO         | NO         |
| 8         | H.-C. Gee, C.-H. Lee, Y.-H. Jeong and W.-D. Jang<br><i>Chem. Commun.</i> , 2011, <b>47</b> , 11963                     | NO                                                 | $\text{CH}_3\text{CN}$                                              | *                           | NO         | NO         |
| 9         | J. Wang and C.-S. Ha<br><i>Analyst</i> , 2011, 136, 1627                                                               | $\text{NO}_3^-$ ,<br>$\text{H}_2\text{PO}_4^-$     | $\text{H}_2\text{O}:\text{MeOH}$<br>(2:5; v/v)                      | *                           | NO         | NO         |
| 10        | V.Bhalla, H. Singh and M. Kumar<br><i>Dalton Trans.</i> , 2012, 41, 11413.                                             | NO                                                 | DMSO                                                                | 0.15 ppm                    | YES        | NO         |
| <b>11</b> | <b>Receptor 3</b>                                                                                                      | <b>NO</b>                                          | <b><math>\text{H}_2\text{O}:\text{EtOH}</math><br/>[2:8; (v/v)]</b> | <b>0.026 ppm</b>            | <b>YES</b> | <b>YES</b> |

\* No data available
